# **Bacterial community composition of recycled irrigation water of a NFT-experimental system, with and without a slow sand filter**

Giovanni Cafà<sup>1,2, #,\*</sup>, Richard Thwaites<sup>2</sup> and Matthew J Dickinson<sup>1</sup>

<sup>1</sup> University of Nottingham, Plant Sciences Division, Sutton Bonington Campus, LE12 5RD Loughborough, UK

<sup>2</sup> The Food and Environment Research Agency (FERA), Sand Hutton, YO41 1LZ, York, UK

# Present address: CABI, Bakeham Lane, TW20 9TY

\* Corresponding author: Giovanni Cafà [g.cafa@cabi.org](mailto:g.cafa@cabi.org)

1 **ABSTRACT**

2 The bacterial community composition (BCC) of recycled irrigation freshwater was  
3 monitored on a Nutrient Film Technique (NFT)-type experimental hydroponic system.  
4 Two identical NFT systems in a greenhouse were used to grow tomato plants. One  
5 was connected to a slow sand filter (SSF), and one was used as control. DNA was  
6 isolated from irrigation freshwater, and molecular methods were carried out to  
7 characterise the BCC. These included terminal-restriction fragment length  
8 polymorphism (T-RFLP), cloning and 454 pyrosequencing. A total number of 291  
9 442 trimmed sequences, of 211 bp average length. A strong differentiation of the  
10 bacterial community composition in recycled irrigation water was triggered by the  
11 activity of the SSF. Phylogenetic affiliation revealed that *Bacilli*, *Alpha*- and  
12 *Gammaproteobacteria*, and *Nitrospira* were differentially abundant during filtration  
13 with the SSF. This study showed that SSF modified the relative amount of a set of  
14 bacterial genera. These included *Pseudomonas*, *Bacillus*, *Flavobacterium*,  
15 *Burkholderia* and *Azospirillum*. These bacteria have been previously described as  
16 plant growth promoting rhizobacteria (PGPR). The presence, increased or exclusive,  
17 in Water *ssf* of bacteria such as *Bacteroidetes*, *Gemmatimonadetes*, *Nitrospira*,  
18 *Firmicutes*, *Alpha*-, *Beta*-, *Gamma*- and *Deltaproteobacteria*, was associated with an  
19 increased biomass in plants. Such findings are promising for future applications of a  
20 combined system NFT-SSF: NFT guarantees a controlled closed environment for the  
21 growth of plants, while the SSF secures the microbiological balance of recycled  
22 irrigation water.

23

## 24 INTRODUCTION

25 Recycled irrigation freshwater is an emerging agroecosystem of growing interest. In  
26 recent years, the possibility of growing plants using re-circulated and replenished  
27 nutrient solution has been increasingly investigated worldwide (Garland, 1994;  
28 Zhang and Tu, 2000; Alsanius *et al.*, 2001; Postma *et al.*, 2001; Frenkel *et al.*, 2010).  
29 It has been demonstrated that the same yields can be obtained in closed systems  
30 (where surplus solution is recovered, replenished, and recycled) as compared to  
31 open systems (once the nutrient solution is delivered to the plant roots, it is not  
32 reused) (Jensen, 1997), as long as good hygienic and environmental conditions are  
33 maintained (Gertsson *et al.*, 1994). The use of recycled irrigation freshwater can  
34 effectively reduce water usage and mitigate nutrient runoff from nursery production  
35 sites. However, serious concerns exist regarding the spread of phytopathogenic  
36 microorganisms via the recycled water (Waechter-Kristensen *et al.*, 1997; Pagliaccia  
37 *et al.*, 2008).

38 Irrigation freshwater can be recycled with nutrient film technique (NFT). NFT is a  
39 simple and cost effective method for growing plants, where roots are emerged in a  
40 continuous flow of re-circulating water containing all the nutrients that plants need. A  
41 root mat develops partly in the shallow stream of re-circulating water and partly  
42 above it. Thus the stream is very shallow, and the upper surface of the root mat that  
43 develops is above the water (Cooper, 1979). NFT can save water and reduce  
44 pollution associated with the need to discharge used solutions into the environment  
45 (Calvo-Bado *et al.*, 2006).

46 Recycling the water supply used for irrigation can generate contamination with plant  
47 pathogens from several sources. The pathogen may be a natural inhabitant of the  
48 water source, or reside in the soil, or in infected resident plants near the water and

49 only be a transient inhabitant of the irrigation water (Hong and Moorman, 2005). Any  
50 infectious propagule has the potential to make contact with the irrigation water and,  
51 upon entry into the nutrient solution, can ultimately make contact with a root  
52 (Stanghellini and Rasmussen, 1994). This contact, which is possible at several  
53 points along the distribution path (Hong and Moorman, 2005), can create a high risk  
54 of contamination for the entire crop. NFT systems are particularly exposed to the  
55 interaction between water and plant roots because of the density of roots exposed in  
56 the air (Stanghellini and Rasmussen, 1994; Clematis *et al.*, 2009). The layout of the  
57 NFT method, in which the plants are produced with bare roots, puts the crop in  
58 danger and, despite the many advantages introduced by the use of recycled  
59 irrigation freshwater, can create the condition for contamination by pathogens (Hong  
60 and Moorman, 2005).

61 Fungi are not the only problem related to recycled irrigation freshwater. The  
62 establishment of bacterial pathogens also represents a concern when producing  
63 minimally processed ready-to-eat vegetables such as tomatoes and lettuce.  
64 *Enterobacteriaceae* such as *Escherichia coli* and *Salmonella* spp. are common in  
65 greenhouse production, and the use of soil-less technologies may increase  
66 apprehension. Viruses can also spread via irrigation water after being released by  
67 plant roots (Büttner *et al.*, 1995): Pelargonium flower break virus can spread in  
68 recirculating nutrient solutions in greenhouses (Berkelmann *et al.*, 1995) as can  
69 tomato mosaic virus (Pares *et al.*, 1992).

70 Risk of contamination of irrigation freshwater can, however, be reduced by the use of  
71 disinfection methods such as slow sand filtration (SSF). SSF is a disinfection method  
72 available since 1974 (Huisman and Wood, 1974, Calvo-Bado *et al.*, 2003). It is a  
73 technique that involves the slow passage of water or liquid through a porous

74 medium, which for horticultural uses is commonly constituted of sand. This  
75 technology is employed to reduce contaminants from freshwater, as a result of a  
76 complex consortium of microorganisms that develops and interacts in the top layer of  
77 the sand column, called *schmutzdecke*. The *schmutzdecke* – a biologically active  
78 layer, can generally be considered as a gelatinous biofilm containing a consortium of  
79 bacteria, fungi, algae, protozoa, rotifers, and a range of aquatic insect larvae. The  
80 activity of the microbiota of the *schmutzdecke* is directly responsible for much of the  
81 treatment function, although it should be stressed that the underlying sand or other  
82 bed material is also responsible for the removal of various fractions from the water. A  
83 ripening period of 3-6 weeks is required for this layer to form, during which the filter  
84 performance is sub-optimal (Joupert and Pillay, 2008).

85 Bacteria are an important component of the *schmutzdecke* in SSF. Bacterial  
86 communities in the *schmutzdecke* have been studied since 1952 (Calaway *et al.*,  
87 1952), where dominant organisms were identified with traditional culture dependent  
88 techniques. One of the first studies that applied modern molecular techniques to  
89 understand the microbiology of SSF was conducted by Petri-Hansen *et al.* (2006).  
90 The bacterial population in the filter was found to be more diverse in distribution  
91 between taxonomic groups and of different physiological functions than previously  
92 recognised. A large component of the community was comprised of *Proteobacteria*  
93 (25%), while the remaining 75% was of less commonly encountered bacterial taxa.  
94 Petri-Hansen *et al.* (2006) showed that the bacterial composition of the  
95 *schmutzdecke* was affected by influent temperature, and mainly determined by the  
96 autochthonous bacteria from the aquatic environment. However, a more detailed  
97 understanding of the bacterial community in SSFs is still needed (Page *et al.*, 2006),  
98 as well as the effect of the SSF on the microflora of recycled irrigation freshwater.

99

100 The objectives of this study were therefore to investigate the bacterial community  
101 composition (BCC) of the recycled irrigation freshwater developing in a NFT-Type  
102 experimental system, focusing on the microflora of the water matrix. This study also  
103 describes the differences between the BCC of the recycled irrigation freshwater with  
104 and without slow sand filtration, focusing on the bacterial taxa that have a higher  
105 relative abundance caused by the activity of the SSF.

106

## 107 **MATERIAL AND METHODS**

108 Tomato plants on rockwool were grown on NFT-Type experimental systems, with  
109 recycled nutrient water fully recycled in the process. DNA was isolated from the  
110 water tomato pfor the investigation of the differences of the bacterial community  
111 composition (BCC) developing in the recycled irrigation freshwater. Each experiment  
112 was carried out in a 28 days cycle with 4 time points (7,14, 21, and 28 days). All data  
113 are presented as the average of three replicates of the 28 days experiments (NFT1,  
114 NFT2, and NFT3), with the exception of the pyrosequencing analysis, which was  
115 performed on one of the three replicates (NFT1).

116 **Nutrient Film Technique (NFT) system.** Two identical replicates of a NFT-Type  
117 system were established in a glasshouse (Sutton Bonington Campus, University of  
118 Nottingham, UK). One was connected to a slow sand filter (SSF, Fig. 1), and the  
119 other one was used as the control. Fifty ml samples of recycled irrigation freshwater  
120 were collected at 4 time points (7,14, 21, and 28 days) from the two water tanks of  
121 the NFT systems, in which tomato plants were grown (*Solanum lycopersicum* cv.  
122 Alicante).

123 Irrigation water was obtained from nutrient stock solution (1:200 VITAFEED-214,  
124 VITAX, Leicester, UK) added to tap water. In all the experiments, an initial volume of  
125 100 L of irrigation water was placed in the main tank; three rows of polyvinyl chloride  
126 channels (PVC) (Geberit, Aylesford, UK) containing 9 plants each were connected to  
127 the 100 L tank, and the pump was activated to allow the continuous flow of water  
128 from the top to the bottom of the PVC channels. The PVC channels were kept at an  
129 inclination of 1.5° to allow the water to return under gravity before being recirculated  
130 by the pump.

131 Plants were grown from seeds of *Solanum lycopersicum* cv. Alicante (Wilkinson,  
132 Worksop, UK) in incubators for 14 days before being transferred to rockwool cubes  
133 and relocated to the NFT system. The NFT system allowed roots to develop outside  
134 rockwool cubes, and establish a thick net of roots in the PVC channel, with water  
135 continuously surrounding the roots of the plants.

136 The flow of irrigation freshwater through the channels was regulated at 2 L/min, and  
137 maintained at a constant rate throughout the experiments. After completion of each  
138 replicate of the experiment, the NFT-Type system was thoroughly washed before  
139 placing new plants and fresh irrigation freshwater. Each experimental replicate was  
140 carried out for 28 days. Samples of 50 ml of recycled irrigation freshwater were  
141 collected every 7 days from the tank of the control system (Water co) and the tank of  
142 the NFT connected to the SSF (Water ssf). An equal volume of irrigation freshwater  
143 was added at the time of sampling to the two tanks. This volume was variable, and  
144 depended on the consumption of water of the system, e.g. a higher volume was  
145 added in warmer months of the season.

146 **Characteristics of the Slow Sand Filter (SSF) connected to the NFT system.** A  
147 SSF was linked to one of the two experimental NFT-Type systems (Fig. 1). The filter

148 was prepared with a 2 m Terrain PVC pipe of 20 cm diameter mounted vertically.  
149 The bottom of the filter was filled with a 30 cm depth of gravel. The column consisted  
150 of a sand bed of 1 m, headed with 60 cm of empty space. The latter space was  
151 occupied by excess water during runs. The water flow through the column was  
152 gravity assisted (speed of water through the column of sand was 0.15 meters per  
153 hour) with an outflow of water regulated at a speed of 4 L/h by a valve. An overflow  
154 pipe was used to maintain a constant water level above the sand column. The sand  
155 ratio consisted of different grain diameters of which 10% was > 1mm, 10% < 0.2mm,  
156 and 80% between 0.2mm and 1mm. This composition is considered the most  
157 effective to encourage the interaction between microorganisms and water, and allow  
158 the water to flow through the sand without being mechanically stopped (Pettitt,  
159 2005). This experimental design determined half of the irrigation freshwater to be  
160 pumped to the top of the channels of the NFT-Type system, and the other half sent  
161 to the top of the column of the sand filter for biofiltration. Additional samples of sand  
162 were collected for molecular tests. These were collected via 'sampling ports' installed  
163 in the column (Fig.1) at different layers of the SSF column: the top (1 cm), the middle  
164 (50 cm) and the bottom layer (80 cm).

165 **Dry weight of plants.** Analysis of variance (ANOVA) was carried out on the dry  
166 weight of tomato plants. This allowed the comparison between the dry weight of the  
167 plants that were grown with recycled irrigation freshwater filtered with the slow sand  
168 filter (treatment plants, ssf-plants), and those grown with non-filtered recycled  
169 irrigation freshwater (control plants, co-plants).

170 **DNA isolation.** For each DNA extraction three technical replicates were produced.  
171 When extracting from water, a negative control of sterile water was processed in  
172 parallel with samples of recycled irrigation freshwater to check for contamination.



173 Genomic DNA was extracted from 50 ml of irrigation freshwater filtered onto a 0.2  
174  $\mu\text{m}$  Whatman nylon filter of 25 mm diameter (Horakova *et al.*, 2008). After filtration,  
175 the 0.2  $\mu\text{m}$  Whatman filter was placed in a microtube, with 0.5 g of glass beads  
176 (Sigma-Aldrich, Gillingham, UK) and 700  $\mu\text{l}$  of extraction buffer. Each tube was  
177 shaken for 3 min in a Fastprep (QBiogene, Cambridge, UK) for cells disruption, for 4  
178 cycles of 45 seconds at  $6.5 \text{ m s}^{-1}$ . After fastprep, the supernatant was recovered.  
179 When extracting DNA from sand, 500 mg of sand were placed directly into the  
180 microtube with glass beads and extraction buffer, skipping the step of filtration with  
181 0.2  $\mu\text{m}$  Whatman filter.

182 To the recovered supernatant, 0.1% (w/v) of sodium dodecyl sulphate (SDS) were  
183 added, and the sample was homogenised and placed on ice for 10 min. Seven  
184 hundred  $\mu\text{l}$  of phenol:chloroform:isoamyl alcohol (25:24:1) were added, followed by  
185 centrifugation at  $5\,000 \times g$  for 15 min. The aqueous phase was recovered, and the  
186 DNA was precipitated with 1.5 volume of isopropanol, and 0.1 volume of 0.5 M NaCl.  
187 The mixture was incubated overnight at  $-20^{\circ}\text{C}$ . After incubation, a centrifugation step  
188 was carried out at  $10\,000 \times g$  for 10 min, and the pellet was washed twice with 300  $\mu\text{l}$   
189 of 70% ethanol. DNA was finally eluted in 30  $\mu\text{l}$  of sterile water. The DNA was further  
190 purified by polyvinylpyrrolidone (PVPP) cleanup method (Menking *et al.*, 1999). One  
191 hundred mg of PVPP were added to a sterile spin column in a 1.5 ml tube. The  
192 column was washed twice with 300  $\mu\text{l}$  of sterile water and centrifuged at  $1\,000 \times g$  for  
193 2 min. After washing, eluted DNA was added to the column and centrifuged at  $1\,000$   
194  $\times g$  for 2 min. DNA concentration was evaluated by 1.5% agarose gel  
195 electrophoresis, and by NanoDrop (ThermoScientific, Wilmington, USA).

196 **PCR amplification of ribosomal DNA.** Isolated DNA was PCR amplified with the  
197 primer pairs for the portions 16S (Muyzer *et al.*, 1993; Muyzer *et al.*, 1995), and the

198 23S (Anthony *et al.*, 2000) of the rRNA (Table 1). Amplifications were performed in a  
199 PTC200 thermocycler (MJ Research, St. Bruno, Quebec, Canada) in 25 µl reactions  
200 containing 1 µl of genomic DNA, 12.5 µl of 2X PCR MangoMix (Bioline, London, UK),  
201 0.5 pmol of each primer and 10.5 µl of sterile distilled water. The following cycles  
202 were used for the DNA amplification: 1 cycle at 94°C for 2 min followed by 30 cycles  
203 of 94°C for 30 s, annealing (Table 1) for 1 min and 72°C for 2 min and 30 s, and a  
204 final extension step of 72°C for 10 min. Amplified DNA was verified by gel  
205 electrophoresis of aliquots of PCR mixtures (4 µl) in 1.5% of agarose in 1X TBE  
206 buffer and ethidium bromide (0.5 µg/ml).

207 When PCR reactions were performed for T-RFLP, the reverse primer was  
208 fluorescently labelled with a Beckman dye at the 5'-end: for 16S rRNA, the primer  
209 926rev was labelled with D3 (D3-926rev), and for 23S rRNA the primer 23Srev was  
210 labelled with D4 (D4-23Srev). All the fluorescent dyes are Beckman dyes provided  
211 by Sigma Proligo (Sigma-Aldrich). PCR products for T-RFLP were digested with two  
212 restriction enzymes (described below) to produce Terminal-Restriction Fragments  
213 (T-RFs) for each amplicon generated by PCR amplification. The combination of pairs  
214 of T-RFs was used for the identification of microorganisms.

215 **Restriction digestion.** Ten µl of PCR product were digested in two separate  
216 reactions for each of the two restriction enzymes *MseI* and *HaeIII* (New England  
217 Biolabs, Hitchin, UK) in a 20 µl reaction volume containing 1U of restriction enzyme  
218 according to the manufacturer's protocols. The digestion mix was incubated at 37°C  
219 for 2 hours, followed by enzyme denaturation by heating at 80°C for 20 min.  
220 Digestion products were verified by gel electrophoresis of aliquots of the digestion  
221 mixture (4 µl) in 2.5% of agarose in 1X TBE buffer and ethidium bromide (0.5 µg/ml).

222 **Terminal Restriction Fragment Length Polymorphism (T-RFLP).** T-RFLPs were  
223 determined by electrophoresis with a CEQ™ 8000, Genetic Analyzer System  
224 (Beckman Coulter, High Wycombe, UK). The product of restriction analysis was  
225 loaded into a 96 well plate with each well containing 38.5 µl of sample loading  
226 solution (GenomeLab, Beckman Coulter, High Wycombe, UK) and 0.5 µl of size  
227 standard-600 (GenomeLab, Beckman Coulter). Samples were covered with mineral  
228 oil and separated on the CEQ™ 8000. Digestions of 16S and 23S rRNA PCR  
229 amplicons were run in the same reaction because they were tagged with different  
230 dyes, D3 and D4 respectively, each of which is read at a different wavelength; to  
231 each well, 1.5 µl of each digestion product was loaded.

232 A quartic polynomial model was run for size standard calibration to improve  
233 correlation between expected and actual sizes (McEniry *et al.*, 2008), particularly for  
234 fragments in the range 400-600bp (Brodie *et al.*, 2002). T-RFs that differed by <0.5  
235 bp in size between replicated profiles were considered identical and only T-RFs that  
236 occurred in at least two of the three replicates were included in the analyses (Dunbar  
237 *et al.*, 2001). T-RFLP datasets were normalised dividing each peak height value by  
238 the sum of all peak height values in the correspondent profile (Hartmann and  
239 Widmer, 2008). Analysis of similarities (ANOSIM) was carried out on quality filtered  
240 T-RFLP datasets, with Bray-Curtis dissimilarity used to compute distance matrices of  
241 correspondence between samples. The ordination method non-metric  
242 multidimensional scaling (nMDS) was carried out on distance matrices with the  
243 software PAST (<http://folk.uio.no/ohammer/past/>), with a Shepard plot and a stress  
244 value reported for each plot.

245 Putative phylogenetic identities of T-RFs were assigned using a database obtained  
246 from the collection of known sequences from NCBI (<http://www.ncbi.nlm.nih.gov>).

247 The DNA sequences were digested *in silico* with the software pDRAW32 (AcaClone  
248 Software, <http://www.acaclone.com/>), which identified all the restriction sites that  
249 were present in the DNA sequences. The database provided pairs of expected gene-  
250 enzyme combinations specific for each group of microorganisms, which were  
251 ultimately compared with experimental T-RFLP datasets.

252 **Purification of PCR products.** PCR products, when used as inserts for cloning  
253 reactions, were purified with GenElute™ PCR Clean-Up Kit (Sigma-Aldrich)  
254 according to the manufacturer's protocol. After elution in water, the concentration of  
255 PCR product was calculated with NanoDrop.

256 **Ligation and cloning.** Purified ribosomal DNA amplicons were used as inserts for  
257 the ligation into pGEM®-T Easy Vector (Promega, Madison, WI USA). The ligation  
258 reaction was carried out in 10 µl volumes with 3U of T4 DNA ligase, 5 µl of 2X  
259 ligation buffer, 1µl of pGEM®-T Easy (50 ng/µl) and 22.5 ng of purified PCR product,  
260 and incubated overnight at 4°C. Promega *Escherichia coli* JM109 cells were  
261 transformed according to the manufacturer's protocol.

262 Transformed cells were incubated at 37°C in Petri dishes with Luria Bertani (LB)  
263 medium, containing agar 15 g/L, IPTG (Isopropyl β-D-1-thiogalactopyranoside) 0.05  
264 mM, X-GAL (5-bromo-4-chloro-3-indolyl-beta-galactoside) 80 µg/ml and Ampicillin  
265 100 µg/ml (Sambrook *et al.*, 1989). White colonies (potential positive clones) were  
266 selected and screened by colony PCR with vector-targeted PCR: M13for (5'-  
267 GTAAAACGACGGCCAGT-3') and M13rev (5'-CAGGAAACAGCTATGAC-3') were  
268 used in 25 µl of PCR reaction in the same conditions as above, with an annealing  
269 temperature of 56°C. Amplified DNA was verified by 1.5% agarose electrophoresis.  
270 Positive clones from the colony PCR were checked by restriction analysis with the  
271 two restriction enzymes *MseI* and *HaeIII*. Clones displaying different banding

272 patterns were selected for sequencing with a Beckman CEQ™8000 automated  
273 sequencer.

274 **Pyrosequencing of the V6 region of 16S rRNA.** Pyrosequencing reads were  
275 obtained from PCR amplicons of the V6 hyper variable region of the 16S rRNA  
276 (Table 1) using a Roche 454™ pyrosequencer (Roche, Basel, Switzerland) available  
277 at FERA (Food and Environment Research Agency, York, UK).

278 Amplifications were performed in a GeneAmp PCR system 9700 (Life Technologies  
279 Ltd, Paisley, UK) in 25 µl reaction volume containing 1 µl of genomic DNA, 5 µl of 5X  
280 KAPAHiFi fidelity buffer (KAPABIOSYSTEMS, Boston, MA USA), 0.75 µl of a mix of  
281 dNTPs 10 mM each, 0.5 pmol of each primer, 0.5 µl KAPAHiFi™ HotStart DNA  
282 polymerase and sterile distilled water. The following cycling conditions were used: 1  
283 cycle at 95°C for 4 min followed by 35 cycles of 98°C for 20 sec, annealing at 57°C  
284 for 15 sec and 72°C for 30 sec, with a final extension step of 72°C for 5 min.

285 Amplified DNA was verified by gel electrophoresis of aliquots of the PCR mixtures (4  
286 µl) in 1.5% of agarose in 1X TBE buffer and ethidium bromide (0.5 µg/ml). The  
287 forward primer contained the adapter forward (5'-  
288 CGTATCGCCTCCCTCGGCCATCAG-3'), and the reverse primer the adapter  
289 reverse (5'-CTATGCGCCTTGCCAGCCCGCTCAG-3'). These two adapters were  
290 used in the library preparation step of pyrosequencing to create a bond between  
291 single stranded amplicons and glass beads. Furthermore, the forward primer was  
292 provided of a specific 10 nucleotide (-nt) multiple identifier (MID) that was added to  
293 the 3'-end of the adapter and to the 5'-end of the forward primer. A set of 4 different  
294 MIDs (MID1 to 4 according to manufacturer's indications) was used to combine  
295 different samples in the same reaction mixture, and retrieve the original sample  
296 composition at the end of the pyrosequencing reaction. PCR products of an

297 approximate length of 280-nt were quantified with PicoGreen (Life Technologies)  
298 followed by quality analyses performed according to the manufacturer's instructions.  
299 Equal amounts of samples were mixed in groups of 4 (containing the 4 different  
300 MID) and run overnight for the pyrosequencing reaction.

301 **Pyrosequencing data analysis.** Raw pyrosequencing data were further analysed  
302 after the quality filtering provided by the 454 pyrosequencer. Samples composition  
303 was investigated through diversity measures, while the phylogenetic identity of the  
304 DNA reads was evaluated with a) RDP classifier (Cole *et al.*, 2009) and b) BLAST  
305 searches, followed by MEGAN (Huson *et al.*, 2007).

306 The software mothur (Schloss *et al.*, 2009) and the RDP pipeline (Cole *et al.*, 2009)  
307 were used in combination for the trimming, alignment and clustering of the  
308 pyrosequencing reads. The statistical and graphics software package R ([www.r-](http://www.r-project.org)  
309 [project.org](http://project.org)) was used to generate rarefaction curves, and the software EstimateS  
310 (Colwell, 2006) to produce diversity indices. In addition, diversity measures were  
311 used to compare the two datasets obtained with T-RFLP and pyrosequencing (Table  
312 5).

313 Quality filtered sequencing reads were trimmed according to published  
314 recommendations (Huse *et al.*, 2007) using the RDP pyrosequencing pipeline (Cole  
315 *et al.*, 2009), with reads shorter than 50bp and containing ambiguous bases  
316 excluded from the analysis. Pyrosequencing reads were aligned with Infernal  
317 (Nawrocki and Eddy, 2007), followed by complete linkage clustering of the RDP  
318 pipeline.

319 The Naïve Bayesian classifier RDP-classifier (Wang *et al.*, 2007) provided rapid  
320 phylogenetic assignment for taxonomic classification. This method was used to  
321 compare the DNA reads obtained from filtered recycled irrigation freshwater (Water

322 *ssf*), the control recycled irrigation freshwater (*Water co*), and the sand of the top  
323 layer of the SSF (*Sand top*) throughout the 4 time points.  
324 The analysis of the time point '28 days' was implemented with a BLASTn analysis  
325 followed by the phylogenetic analysis with the software MEGAN (Huson *et al.*, 2007).  
326 MEGAN provides hierarchical tree construction based on BLAST searches (Altschul  
327 *et al.*, 1990), assigning the 16S rRNA gene reads to NCBI taxonomy. MEGAN also  
328 calculates relative abundances of pyrosequencing reads among samples. BLAST  
329 searches give a more accurate analysis of query sequences as compared to the  
330 RDP classifier; however, the production of the BLASTn file (input file for MEGAN) is  
331 highly time consuming and requires powerful processing units. For this reason,  
332 BLASTn files were produced for the '28 days' time point only, with the assumption  
333 that this time point would be the most informative of the 4.

334 **Diversity indices and richness estimators.** The diversity of bacteria in recycled  
335 irrigation freshwater was estimated to compare the molecular methods T-RFLP and  
336 pyrosequencing (Table 5). The richness estimators Chao1 (Chao and Bunge, 2002)  
337 and ACE (Chao *et al.*, 2006) were used for the analysis of pyrosequencing data.

338

## 339 **RESULTS**

340 **Plant growth.** The dry weight of the plants *Solanum lycopersicum* cv. Alicante,  
341 grown in the experimental NFT-Type systems were used to assess the effect of slow  
342 sand filtration on plant growth. ANOVA (Figure 2) showed that plant growth was  
343 significantly affected by the filtration with the slow sand filter ( $F_{1,18} = 4.78$ ,  $p = 0.036$ ).  
344 Plants grown with filtered recycled irrigation freshwater (*ssf*-plants) had a larger  
345 biomass than those grown with control recycled irrigation freshwater (*co*-plants).



346 **Bacterial Community Composition (BCC) with T-RFLP.** ANOSIM was performed  
347 on T-RFLP datasets (Table 2) to test the effect of the slow sand filtration ( $H_0$  *ssf*) and  
348 time ( $H_0$  *time*) on the BCC of recycled irrigation freshwater. Slow sand filtration and  
349 time had a significant effect on the BCC of recycled irrigation freshwater. Datasets  
350 were analysed to test the null hypothesis that i) there were no differences between  
351 datasets over the 4 time points ( $H_0$  *time*); and ii) there were no differences in the  
352 BCC between filtered recycled irrigation freshwater (*Water ssf*) and control recycled  
353 irrigation freshwater (*Water co*) ( $H_0$  *ssf*). The results from 16S and 23S rRNA genes  
354 showed R-values between 0.8 and 1 with all gene-enzyme combinations, and were  
355 supported by low probability values (all <0.0001).  
356 Multivariate statistical tests of T-RFLP datasets with nMDS showed that samples of  
357 *Water ssf* occupied the same part of the plot starting at 14 days of filtration (Fig. 3).  
358 This was particularly clear with the gene-enzyme combination 23S-*MseI*: the nMDS  
359 plot shows that after 7 days, *Water ssf* and *Water co* (black spots and red crosses  
360 respectively) grouped together on the left hand side of the plot. For the other time  
361 points, samples of *Water co* plotted in the top right hand side, while *Water ssf*  
362 grouped together and seemed to stabilise in the same position of the plot after 14, 21  
363 and 28 days.

364 **Pyrosequencing of the V6 region of 16S rRNA gene.** Pyrosequencing analysis  
365 was performed on the hypervariable V6 region of the 16S rRNA. A total of 332 608  
366 DNA reads were obtained by 454 pyrosequencing (Table 3). Of those, 291 442  
367 (87.6%) passed the quality filter check, with an average length of 211 bp. DNA reads  
368 were further analysed with the RDP pyrosequencing pipeline and *mothur*.  
369 For the description of the communities, trimmed sequences were clustered into  
370 groups of defined sequence variation that ranged from unique sequences (no



371 variation) to 10% differences by mothur. These clusters were then used to plot OTUs  
372 versus the number of tags for generating rarefaction curves (data not shown) and for  
373 obtaining richness estimators such as the abundance-coverage estimator (ACE) and  
374 Chao1. These indices showed that the species diversity estimation was of the third  
375 order of magnitude. At 97% similarity, Chao1 predicted that the maximum number of  
376 OTUs was between 11 016 and 15 100 for Water *ssf*, 4 530 and 17 369 for Water *co*  
377 and 7 271 to 16 126 for sand of the top layer (Sand *top*) (Table 4).

378 ACE and Chao1 constantly estimated a number of OTUs higher than those that were  
379 effectively obtained, suggesting that sampling represented a limitation for the  
380 identification of the total number of species.

381 **Bayesian hierarchical identification of pyrosequencing reads.** Pyrosequencing  
382 reads of recycled irrigation freshwater and the sand of the top layer of the SSF were  
383 phylogenetically assigned with the Naïve Bayesian classifier of the RDP-classifier  
384 (Fig. 4). Major changes were observed for the classes of *Bacilli*, *Alpha*- and  
385 *Gammaproteobacteria* and *Nitrospira*. The latter taxon was more abundant in Water  
386 *ssf* and Sand *top*, while only a minor number of reads were detected in Water *co*.  
387 *Alphaproteobacteria* decreased in relative abundance throughout the 4 time points.  
388 *Gammaproteobacteria* were less abundant in Water *ssf* after 28 days as compared  
389 to Water *co*. *Bacilli* increased their relative abundance in three of the four time  
390 points. Only after 21 days, *Bacilli* were more abundant in the Water *co* as compared  
391 to Water *ssf*.

392 **Phylogenetic identification of pyrosequencing reads using MEGAN.** To provide  
393 a higher resolution of phylogenetic assignment beyond the class level, recycled  
394 irrigation freshwater and sand of the top layer of the SSF were analysed with  
395 BLASTn and MEGAN (Fig 5). Slow sand filtration increased the number of taxa in

396 the recycled irrigation freshwater from 26 of Water *co* to 45 of Water *ssf*. The three  
397 investigated samples (Water *ssf* after 28 days-28 *ssf*, Water *co* after 28 days-28 *co*;  
398 and Sand *top* after 28 days-28 *top*) shared 17 genera, with only 6 shared by Water  
399 *ssf* and Water *co*. Overall, the most abundant phyla were *Actinobacteria*,  
400 *Bacteroidetes*, *Firmicutes* and *Proteobacteria*.  
401 Several groups of bacteria were exclusively present in Water *ssf* (28 *ssf*). These taxa  
402 included *Fluviicola* and *Flavobacterium* of the class of *Bacteroidetes*, *Deinococcus* of  
403 the class of *Deinococci*, *Exiguobacterium* and *Lactobacillus* of the class of *Bacilli*,  
404 *Prosthecomicrobium*, *Methylobacterium*, *Rhizobium*, *Sinorhizobium*, *Stappia*,  
405 *Magnetospirillum* and unclassified *Rickettsiales* of the class of *Alphaproteobacteria*,  
406 *Burkholderia*, *Acidovorax*, *Delftia* and *Aquabacterium* of the class of  
407 *Betaproteobacteria*, and finally *Acinetobacter* and unclassified  
408 *Gammaproteobacteria*.  
409 Other groups of bacteria increased their relative abundance after 28 days of filtration  
410 with the SSF. These included unclassified *Gemmatimonadetes*, *Nitrospira* of the  
411 phylum *Nitrospira*, *Azorhizobium*, *Rhodobacter*, *Roseobacter* and *Stella* of the class  
412 of *Alphaproteobacteria*, *Nitrosomonas* and *Azoarcus* of the class of  
413 *Betaproteobacteria*, *Bdellovibrio* and *Geobacter* of the class of *Deltaproteobacteria*,  
414 and finally *Pseudomonas* of the class of *Gammaproteobacteria*. Interestingly, two  
415 microorganisms responsible for two different step of the oxidation of nitrogen were  
416 enhanced by the slow sand filtration, such as *Nitrosomonas* and *Nitrospira*. In  
417 particular, the latter showed a large increase in number of reads between Water *ssf*  
418 and Water *co*, with 1749 reads against 18.  
419 Other microorganisms showed a reduction of relative abundance between Water *ssf*  
420 and Water *co*. These included *Microbacterium* of the class of *Actinobacteria*,

421 *Sphingomonas* and *Azospirillum* of the class of *Alphaproteobacteria*, unclassified

422 *Alcaligenaceae* of the class of *Betaproteobacteria* and unclassified

423 *Enterobacteriaceae* of the class of *Gammaproteobacteria*.

424 Finally, some organisms did not appear in Water *ssf*, while did in Water *co*. These

425 included, *Leucobacter* and *Streptomyces* of the class of *Actinobacteria*, *Pedobacter*

426 of the class of *Sphingobacteria*, unidentified *Neisseriaceae* of the class of

427 *Betaproteobacteria*, and *Legionella* of the class of *Gammaproteobacteria*.

428 **Comparison of pyrosequencing and T-RFLP.** T-RFLP and pyrosequencing results

429 showed some degrees of similarity. T-RFLP provided a rapid overview of changes in

430 dominant members of the community and, when implemented with clone libraries,

431 their phylogenetic identification. However, pyrosequencing data provided in depth

432 information about changes in the relative amount of thousands of OTUs, which were,

433 at least, of 2 orders of magnitude higher than T-RFLP.

434 T-RFLP underestimated the diversity of the systems expressed by Shannon and

435 Simpson indices (Table 5). These two indicators were always lower for T-RFLP data.

436 Nonetheless, T-RFLP provided reliable information about major groups of bacteria

437 and their patterns of relative abundances. 16S rRNA T-RFLP detected the increase

438 of *Pseudomonas* sp., *Cellvibrio* sp. and *Nitrosospira* sp. and the decrease of

439 *Novosphingobium* sp. in Water *ssf* as compared to Water *co* (Table 6). When T-

440 RFLP was performed on 23S rRNA amplicons, an increase was detected for

441 *Azoarcus aromaticum*, *Paenibacillus* sp. and *Ochrobactrum intermedium*, while a

442 decrease was detected for *Sphingomonas* sp.

443

444

## 445 **DISCUSSION**

446 A strong differentiation of the bacterial community composition (BCC) in recycled  
447 irrigation freshwater was triggered by the activity of the slow sand filter (SSF). The  
448 bioactive layer of the SSF, the schmutzdecke, affects the BCC of recycled irrigation  
449 freshwater. Specifically, phylogenetic affiliation of DNA reads revealed that the most  
450 affected classes of bacteria were *Bacilli*, *Alpha-* and *Gammaproteobacteria*, and  
451 *Nitrospira*. In addition, a larger diversity of bacteria was detected in recycled  
452 irrigation freshwater filtered with the SSF (Water *ssf*), as compared to control  
453 recycled irrigation freshwater (Water *co*): after 28 days of a NFT-type experiment,  
454 pyrosequencing data detected 45 taxa in Water *ssf*, against 26 in Water *co*. In  
455 addition, plant growth was enhanced when recycled irrigation freshwater was filtered  
456 with the SSF (Fig. 2). The activity of the schmutzdecke has been previously reported  
457 to be able to affect the BBC (Joupert and Pillay, 2008), but also to affect the  
458 abundance of common plant pathogens such as zoosporic fungi (Calvo-Bado *et al.*,  
459 2003; Calvo-Bado *et al.*, 2006; Deniel *et al.*, 2006). Further experiments were carried  
460 out to estimate whether the schmutzdecke needs adaption to be able to carry out its  
461 function in the SSF. Such tests confirmed that maturity is reached after 8 weeks  
462 (data not shown). The qualities of a SSF are promising for future applications of a  
463 combined system NFT-SSF: NFT guarantees a controlled closed environment for the  
464 growth of plants, while the SSF secures a microbiological balance of the system,  
465 which, in our experiments, has shown to enhance plant growth (Fig. 2).

466 Four main phyla of bacteria were detected as major components of the microflora of  
467 recycled irrigation freshwater. These included *Actinobacteria*, *Proteobacteria*,  
468 *Firmicutes* *Bacteroidetes*. High diversity was detected within these groups of  
469 bacteria, indicating that the nutrient solution of a hydroponic system consists of a rich

470 microbiological environment (Berkelmann *et al.*, 1994). Major taxa within the above  
471 phyla that were identified in this study have been previously described as common  
472 inhabitant of nutrient solutions. These included *Pseudomonadaceae*,  
473 *Xanthomonadaceae*, *Rhizobiaceae* and *Bacillaceae* (Berkelmann *et al.*, 1994;  
474 Koohakan *et al.*, 2004; Calvo-Bado *et al.*, 2006). In addition, several species  
475 detected in this study have been previously reported as efficient biocontrol agent  
476 against the common plant pathogen *Fusarium oxysporum*. These included *Bacillus*  
477 *subtilis* (Baysal *et al.*, 2008), *Bacillus megaterium* and *Burkholderia cepacia* (Omar *et*  
478 *al.*, 2006),

479 The activity of the SSF determined a change in the BCC of recycled irrigation  
480 freshwater. This study showed that SSF influenced the relative abundance of a set of  
481 bacterial genera such as *Pseudomonas*, *Bacillus*, *Flavobacterium*, *Burkholderia* and  
482 *Azospirillum*. These bacteria have been previously described as plant growth  
483 promoting rhizobacteria (PGPR) (Glick, 1995; Lucy *et al.*, 2004). Several reports  
484 have suggested that PGPR stimulate plant growth by facilitating the uptake of  
485 minerals into the plant (Kloepper *et al.*, 1988). However, there is some controversy  
486 regarding the mechanisms that PGPR employ in the uptake of minerals (Bashan *et*  
487 *al.*, 1990). Increased plant growth was observed when the nutrient solution was  
488 filtered with the SSF, after the period of ripening. However, no evidence has been  
489 previously reported of plant growth promotion by slow sand filtration. To support  
490 such findings, further work should be addressed at the isolation and deployment of  
491 specific consortia of microorganisms, in order to test their efficiency alone. Ideally,  
492 this should facilitate the formulation of recipes of consortia of microorganisms with  
493 which recycled nutrient solution in soilless hydroponic systems should be enriched.

494 The presence, increased or exclusive, in Water *ssf* of bacteria such as  
495 *Bacteroidetes*, *Gemmatimonadetes*, *Nitrospira*, *Firmicutes*, *Alpha-*, *Beta-*, *Gamma-*  
496 and *Deltaproteobacteria*, was associated with an increased biomass in plants.  
497 However, it remains unclear whether physical-chemical interactions in the sand bed  
498 of the SSF actively contribute to the plant growth promoting effect. For instance,  
499 small scale sand filters could be used to prime nutrient solutions of recycled irrigation  
500 water, enabling the enrichment of the bacterial population, followed by an incubation  
501 period for the multiplication of the bacteria before employing the solution in  
502 hydroponic systems. The use of a slow sand filter represents a natural and  
503 inexpensive biological solution to enrich the bacterial population of recycled irrigation  
504 water, in a system where higher diversity reduces risks of colonization of single  
505 species (Stecher *et al.*, 2010). Furthermore, these results increase scepticism on the  
506 use of disinfection methods that greatly reduce the microbial content such as UV  
507 disinfection (Zhang and Tu, 2000) and heat treatments (Runia *et al.*, 1988). These  
508 findings suggest that a higher biodiversity of the BCC in the recycled irrigation  
509 freshwater has positive effects for the ecosystem, in which multiple interactions  
510 among species of several different phyla contribute to the efficiency of the NFT-Type  
511 experimental system.

512 The integration of fingerprinting and next generation sequencing provided the  
513 identification of microorganisms in recycled irrigation water. In this work, T-RFLP  
514 was developed for detecting microorganisms in water, using experimental tests to  
515 estimate the reliability and sensitivity of the method. These procedures showed that  
516 bacteria inoculated in sterile water are detected when their concentration is above  
517 the threshold of  $10^3$  cells  $\text{ml}^{-1}$ , and that an identical T-RFLP profile is obtained from  
518 overlaid T-RFLP profiles of single bacterial colonies, after DNA isolation/PCR/T-

519 RFLP procedures, only when the concentration of cells in freshwater is at least of  $10^6$   
520  $\text{ml}^{-1}$  (data not shown). At this concentration, T-RFLP is reliable and able to estimate  
521 relative amount of single species. T-RFLP has the advantage of being a rapid and  
522 reliable method that, at affordable prices, provides an overview of the system  
523 nonetheless. Another advantage of T-RFLP is that it provides datasets that can used  
524 to test complex hypotheses with multivariate statistics, which remains extremely  
525 useful when comparing different environments. In addition, this method showed  
526 complementarity with pyrosequencing results. Other authors (Jakobsson *et al.*, 2010)  
527 have reported congruence between T-RFLP and pyrosequencing results. Our data  
528 supported such findings, showing that T-RFLP provides accurate information about  
529 dominant groups of microorganisms. Pyrosequencing, on the other hand, provides in  
530 depth information on thousands of operational taxonomic units (OTUs).  
531 The analysis of pyrosequencing data produced useful species richness estimators  
532 that facilitated the ecosystem characterization. For example, Chao1 (Chao *et al.*,  
533 2006) was used to predict the species diversity of recycled irrigation water. This  
534 estimation, on average, showed that 50 ml contained around 10 000 OTUs at 97%  
535 similarity, going down to around 5 000 OTUs at 90% similarity. Other authors have  
536 previously estimated this diversity: Berkelmann *et al.* (1994) showed that the nutrient  
537 solution of a hydroponic system with rockwool as substrate, can contain up to  $10^5$ -  
538  $10^6$  colony-forming units (CFU)  $\text{ml}^{-1}$  after 20 hours from planting tomato plants. Other  
539 attempts to estimate richness have mainly focused on other matrices rather than  
540 water. For example, using 1 gram of soil as the unit, the estimation of OTUs is  
541 considered to be between 2 000 and 5 000 (Schloss and Handelsman, 2005), and  
542 the number of distinct genomes, based on DNA reassociation kinetics, between 2  
543 000 and 18 000 (Torsvik *et al.*, 1990; Torsvik *et al.*, 1996; Sandaa *et al.*, 1999;

544 Dunbar *et al.*, 2001). Clearly, traditional microbiological methods for the isolation of  
545 microorganisms have the potential to determine only dominant populations, and tend  
546 to mask the detection of low-abundance species (Sogin *et al.*, 2006). The large  
547 number of highly diverse, low-abundance species in an ecosystem constitutes a rare  
548 'biosphere' that is largely unexplored. Recent developments in high throughput  
549 molecular methods are beginning to provide deep insights into a wide range of  
550 ecosystems, supplying information on microorganisms and their roles in the  
551 environment.

552 In conclusion, this study shows that the BCC of recycled irrigation freshwater is a  
553 diverse ecosystem, and supports the finding of Berkelmann *et al.* (1994), for which  
554 irrigation freshwater should be carefully preserved in order to avoid the colonisation  
555 of available ecological niches by single species and/or dangerous pathogens. In  
556 addition, in this study the use of a SSF showed that the BCC of irrigation freshwater  
557 can be altered by biofiltration, and that this had positive effect on plant growth. The  
558 use of fingerprinting methods such as T-RFLP provided useful information on the  
559 dynamics of bacterial populations in freshwater, and allowed rapid and inexpensive  
560 monitoring of the microflora. A consistent monitoring of recycled irrigation freshwater,  
561 however, remains of extremely importance, in order to avoid the intrusion of  
562 allochthonous microorganisms that can occur anytime in the distribution path of a  
563 hydroponic system (Hong and Moorman, 2005). Also, when dealing with closed  
564 hydroponic systems, this aspect becomes even more important: the invasion of  
565 external species has the potential of spreading to the entire crop, assuming that the  
566 environmental conditions are favourable for the pathogen.

567

568



569 **ACKNOWLEDGEMENTS**

570 This study was part of the PhD work of Giovanni Cafà, funded by the University of  
571 Nottingham (Nottingham, UK) and the Food and Environment Research Agency  
572 (FERA; York, UK).

573

574 **REFERENCES**

575 Alsanius, B.W., Nilsson, L., Jensen, P., Wohanka, W., 2001. Microbial communities  
576 in slow filters. *Acta Hortic.* 548, 591-601.

577 Altschul, S.F., Gish, W., Miller, W., Myers, E.W., Lipman, D.J., 1990. Basic local  
578 alignment search tool. *J. Mol. Biol.* 215, 403-410.

579 Anthony, R.M., Brown, T.J., French, G.L., 2000. Rapid diagnosis of bacteremia by  
580 universal amplification of 23S ribosomal DNA followed by hybridization to an  
581 oligonucleotide array. *J. Clin. Microbiol.* 38, 781-788.

582 Bashan, Y., Harrison, S.K., Whitmoyer, R.E., 1990. Enhanced growth of wheat and  
583 soybean plants inoculated with *Azospirillum brasilense* is not necessarily due to  
584 general enhancement of mineral uptake. *Appl. Environ. Microbiol.* 56, 769-775.

585 Baysal, O., Caliskan, M., Yesilova, O., 2008. An inhibitory effect of a new *Bacillus*  
586 *subtilis* strain (EU07) against *Fusarium oxysporum* f. sp. *radicislycopersici*.  
587 *Physiological and Molecular Plant Pathology* 73, 25-32.

588 Berkelmann, B., Wohanka, W., Krczal, G., 1995. Transmission of Pelargonium flower  
589 break virus (PFBV) by recirculating nutrient solution with and without slow sand  
590 filtration. *Acta Hortic.* 382, 256-262.

591 Berkelmann, B., Wohanka, W., Wolf, G.A., 1994. Characterization of the bacterial  
592 flora in circulating nutrient solutions of a hydroponic system with rockwool. *Acta*  
593 *Hortic.* 361, 372-381.

- 594 Brodie, E., Edwards, S., Clipson, N., 2002. Bacterial community dynamics across a  
595 floristic gradient in a temperate upland grassland ecosystem. *Microb. Ecol.* 44, 260-  
596 270.
- 597 Büttner, C., Marquardt, K., Führling, M., 1995. Studies on transmission of plant  
598 viruses by recirculating nutrient solution such as ebb-flow. *Hydroponics and*  
599 *Transplant Production* 396, 265-272.
- 600 Calaway, W.T., Carroll, W.R., Long, S.K., 1952. Heterotrophic bacteria encountered  
601 in intermittent sand filtration of sewage. *Sewage and Industrial Wastes* 24, 642-653.
- 602 Calvo-Bado, L.A., Petch, G., Parsons, N.R., Morgan, J.A.W., Pettitt, T.R., Whipps,  
603 J.M., 2006. Microbial community responses associated with the development of  
604 oomycete plant pathogens on tomato roots in soilless growing system. *J. Appl.*  
605 *Microbiol.* 100, 1194-1207.
- 606 Calvo-Bado, L.A., Pettitt, T.R., Parsons, N., Petch, G.M., Morgan, J.A.W., Whipps,  
607 J.M., 2003. Spatial and temporal analysis of the microbial community in slow sand  
608 filters used for treating horticultural irrigation water. *Appl. Environ. Microbiol.* 69,  
609 2116–2125.
- 610 Cardinale, B.J., 2011. Biodiversity improves water quality through niche partitioning.  
611 *Nature* 467, 86-89.
- 612 Chao, A., Bunge, J., 2002. Estimating the number of species in a stochastic  
613 abundance model. *Biometrics* 58, 531-539.
- 614 Chao, A., Chazdon, R.L., Colwell, R.K., Shen, T., 2006. Abundance-based similarity  
615 indices and their estimation when there are unseen species in samples. *Biometrics*  
616 62, 361-371.

- 617 Clematis, F., Minuto, A., Gullino, M.L., Garibaldi, A., 2009. Suppressiveness to  
618 *Fusarium oxysporum* f. sp. *radicis lycopersici* in re-used perlite and perlite-peat  
619 substrates in soilless tomatoes. *Biol. Control* 48, 108-114.
- 620 Cole, J.R., Wang, Q., Cardenas, E., Fish, J., Chai, B., Farris, R.J., Kulam-Syed-  
621 Mohideen, A.S., McGarrell, D.M., Marsh, T., Garrity, G.M., Tiedje, J.M., 2009. The  
622 Ribosomal Database Project: improved alignments and new tools for rRNA analysis.  
623 *Nucleic Acids Res.* 37, D141-D145.
- 624 Colwell, R.K., 2006. EstimateS: statistical estimation of species richness and shared  
625 species from samples. Version 8. Department of Ecology & Evolutionary Biology,  
626 University of Connecticut, Storrs.
- 627 Cooper, A., 1979. *The ABC of NFT*. Grower books, London, UK.
- 628 Deniel, F., Renault, D., Tirilly, Y., Barbier, G., Rey, P., 2006. A dynamic biofilter to  
629 remove pathogens during tomato soilless culture. *Agronomy for Sustainable*  
630 *Development* 26, 185-193.
- 631 Dunbar, J., Ticknor, L.O., Kuske, C.R., 2001. Phylogenetic specificity and  
632 reproducibility and new method for analysis of terminal restriction fragment profiles of  
633 16S rRNA genes from bacterial communities. *Appl. Environ. Microbiol.* 67, 190-197.
- 634 Frenkel, O., Yermiyahu, U., Forbes, G.A., Fry, W.E., Shtienberg, D., 2010.  
635 Restriction of potato and tomato late blight development by sub-phytotoxic  
636 concentrations of boron. *Plant Pathology* 59, 626-633.
- 637 Garland, J.L., 1994. The structure and function of microbial communities in  
638 recirculating hydroponic systems. *Advances in Space Research* 11, 383-386.
- 639 Gertsson, U.E., Hansson, I., Waechter-Kristensen, B., Lundquist, S., Svedelius, G.,  
640 Weich, R., 1994. Tomato grown in circulating nutrient solution using rockwool and as  
641 hydroponics. *Acta Hort.* 361, 237-244.

- 642 Glick, B.R., 1995. The enhancement of plant growth by free-living bacteria. *Can. J.*  
643 *Microbiol.* 41, 109-117.
- 644 Hartmann, M., Widmer, F., 2008. Reliability for detecting composition and changes  
645 of microbial communities by T-RFLP genetic profiling. *FEMS Microbiol. Ecol.* 63,  
646 249-260.
- 647 Hong, C., Moorman, G.W., 2005. Plant pathogens in irrigation water: challenges and  
648 opportunities. *Crit. Rev. Plant Sci.* 24, 189-208.
- 649 Horakova, K., Mlejnkova, H., Mlejnek, P., 2008. Evaluation of methods for isolation  
650 of DNA for polymerase chain reaction (PCR)-based identification of pathogenic  
651 bacteria from pure cultures and water samples. *Water Science and Technology* 58,  
652 995-999.
- 653 Huisman, L., Wood, W.E., 1974. *Slow sand filtration*. World Health Organization,  
654 Geneva.
- 655 Huse, S.M., Huber, J.A., Morrison, H.G., Sogin, M.L., Welch, D.M., 2007. Accuracy  
656 of and quality of massively parallel DNA pyrosequencing. *Genome Biology* 8, R143.
- 657 Huson, D.H., Auch, A.F., Qi, J., Schuster, S.C., 2007. MEGAN analysis of  
658 metagenomic data. *Genome Res.* 17, 377-386.
- 659 Jakobsson, H.E., Jernberg, C., Andersson, A.F., Sjolund-Karlsson, M., Jansson,  
660 J.K., Engstrand, L., 2010. Short-term antibiotic treatment has differing long-term  
661 impacts on the human throat and gut microbiome. *PLoS One* 5.
- 662 Jensen, M.H., 1997. *Hydroponics*. *HortScience* 32, 1018-1021.
- 663 Joupert, E.D., Pillay, B., 2008. Visualization of the microbial colonization of a slow  
664 sand filter using an environmental scanning electron microscope. *Electronic Journal*  
665 *of Biotechnology* 11.

- 666 Kloepper, J.W., Lifshitz, R., Schroth, M.N., 1988. *Pseudomonas* inoculant to benefit  
667 plant production. *ISI Atlas of Science: Animal and Plant Sciences*, 30-34.
- 668 Koohakan, P., Ikeda, H., Jeanaksorn, T., Tojo, M., Kusakari, S., Okada, K., Sato, S.,  
669 2004. Evaluation of the indigenous microorganisms in soilless culture: occurrence  
670 and quantitative characteristics in the different growing systems. *Scientia*  
671 *Horticulturae* 101, 179-188.
- 672 Lucy, M., Reed, E., Glick, R., 2004. Application of free living plant growth promoting  
673 rhizobacteria. *Antonie Van Leeuwenhoek* 86, 1-25.
- 674 McEniry, J., O'Kiely, P., Clipson, N.J.W., Forristal, P.D., Doyle, E.M., 2008. Bacterial  
675 community dynamics during the ensilage of wilted grass. *J. Appl. Microbiol.* 105,  
676 359-371.
- 677 Menking, D.E., Emanuel, P.A., Valdes, J.J., Kracke, S.K., 1999. Rapid cleanup of  
678 bacterial DNA from field samples. *Resources Conservation and Recycling* 27, 179-  
679 186.
- 680 Muyzer, G., de Waal, E.C., Uitterlinden, A.G., 1993. Profiling of complex microbial  
681 populations by denaturing gradient gel electrophoresis analysis of polymerase chain  
682 reaction-amplified genes coding for 16S rRNA. *Appl. Environ. Microbiol.* 59, 695-700.
- 683 Muyzer, G., Teske, A., Wirsén, C.O., 1995. Phylogenetic relationships of  
684 *Thiomicrospira* species and their identification in deep-sea hydrothermal vent  
685 samples by denaturing gradient gel electrophoresis of 16S rDNA fragments. *Arch.*  
686 *Microbiol.* 164, 165-172.
- 687 Nawrocki, E.P., Eddy, S.R., 2007. Query-dependent banding (QDB) for faster RNA  
688 similarity searches. *PLOS Comput. Biol.* 3, e56.

- 689 Omar, I., O'Neill, T.M., Rossall, S., 2006. Biological control of fusarium crown and  
690 root rot of tomato with antagonistic bacteria and integrated control when combined  
691 with the fungicide carbendazim. *Plant Pathology* 55, 92-99.
- 692 Page, D., Wakelin, S., van Leeuwen, J., Dillon, P., 2006. Review of biofiltration  
693 processes relevant to water reclamation via aquifers. CSIRO Land and Water.
- 694 Pagliaccia, D., Merhaut, D., Colao, M.C., Ruzzi, M., Saccardo, F., Stanghellini, M.E.,  
695 2008. Selective enhancement of the fluorescent pseudomonad population after  
696 amending the recirculating nutrient solution of hydroponically grown plants with a  
697 nitrogen stabilizer. *Microb. Ecol.* 56, 538-554.
- 698 Pares, R.D., Gunn, L.V., Cresswell, G.C., 1992. Tomato mosaic virus infection in a  
699 recirculating nutrient solution. *J. Phytopathol.* 135, 192–198.
- 700 Petri-Hansen, H., Steele, H., Grooters, M., Wingender, J., Flemming, H.C., 2006.  
701 Recent progress in slow sand and alternative biofiltration processes. IWA publishing,  
702 London, UK.
- 703 Pettitt, T.R., 2005. Slow sand filtration, a flexible, economic biofiltration method for  
704 cleaning irrigation water. A grower guide. Horticultural Development Council.
- 705 Postma, J., Lankwarden, J.B.L., van Elsas, J.D., 2001. Molecular fingerprinting of  
706 microbial populations in soilless culture systems. *Acta Hortic.* 548, 537-541.
- 707 Runia, W.T., van Os, E.A., Bollen, G.J., 1988. Disinfection of drainwater from soilless  
708 cultures by heat-treatment. *Netherlands Journal of Agricultural Science* 36, 231-238.
- 709 Sambrook, J., Fritsch, E., Maniatis, T., 1989. *Molecular cloning: a laboratory manual*.  
710 Cold Spring Harbor Press, New York.
- 711 Sandaa, R., Torsvik, V., Enger, Ø., Daae, F.L., Castberg, T., Hahn, D., 1999.  
712 Analysis of bacterial communities in heavy metal-contaminated soils at different  
713 levels of resolution. *FEMS Microbiol. Ecol.* 30, 237-251.

- 714 Schloss, P.D., Handelsman, J., 2005. Introducing DOTUR, a computer program for  
715 defining operational taxonomic units and estimating species richness. *Appl. Environ.*  
716 *Microbiol.* 71, 1501-1506.
- 717 Schloss, P.D., Westcott, S.L., Ryabin, T., Hall, J.R., Hartmann, M., Hollister, E.B.,  
718 Lesniewski, R.A., Oakley, B.B., Parks, D.H., Robinson, C.J., Sahl, J.W., Stres, B.,  
719 Thallinger, G.G., Van Horn, D.J., Weber, C.F., 2009. Introducing mothur: open-  
720 source, platform-independent, community-supported software for describing and  
721 comparing microbial communities. *Appl. Environ. Microbiol.* 75, 7537–7541.
- 722 Sogin, M.L., Morrison, H.G., Huber, J.A., Welch, D.M., Huse, S.M., Neal, P.R.,  
723 Arrieta, J.M., Herndl, G.J., 2006. Microbial diversity in the deep sea and the  
724 underexplored "rare biosphere". *Proc. Natl. Acad. Sci. U. S. A.* 103, 12115-12120.
- 725 Stanghellini, M.E., Rasmussen, S.L., 1994. Hydroponics: a solution for zoosporic  
726 pathogens. *Plant Dis.* 78, 1129-1138.
- 727 Stecher, B., Chaffron, S., Käppeli, R., Hapfelmeier, S., Friedrich, S., Weber, T.C.,  
728 Kirundi, J., Suar, M., McCoy, K.D., von Mering, C., Macpherson, A.J., Hardt, W.,  
729 2010. Like will to like: abundances of closely related species can predict  
730 susceptibility to intestinal colonization by pathogenic and commensal bacteria. *PLOS*  
731 *Pathogens* 6.
- 732 Torsvik, V., Goksoyr, J., Daae, F.L., 1990. High diversity in DNA of soil bacteria.  
733 *Appl. Environ. Microbiol.* 56, 782-787.
- 734 Torsvik, V., Sorheim, R., Goksoyr, J., 1996. Total bacterial diversity in soil and  
735 sediment communities – a review. *J. Ind. Microbiol.* 17, 170-178.
- 736 Waechter-Kristensen, B., Sundin, P., Berkemann-Loehnertz, B., Wohanka, W.,  
737 1997. Management of microbial factors in the rhizosphere and nutrient solution of

738 hydroponically grown tomato. International Symposium on Growing Media and Plant

739 Nutrition 1, 335-340.

740 Wang, Q., Garrity, G.M., Tiedje, J.M., Cole, J.R., 2007. Naive Bayesian classifier for

741 rapid assignment of rRNA sequences into the new bacterial taxonomy. Applied

742 and Environmental Microbiology 73, 5261-5267.

743 Zhang, W., Tu, J.C., 2000. Effect of ultraviolet disinfection of hydroponic solutions on

744 Pythium root and non-target bacteria. European Journal of Plant Pathology 106, 415-

745 421.

746

747



748 **FIGURE LEGENDS**

749 **Figure 1** Schematic representation of the experimental NFT system connected to  
750 the slow sand filter. Recycled irrigation water was directed to the top of the column of  
751 the sand filter and to the channels of the NFT with the aid of a pump (\*). Channels of  
752 PVC had an inclination of 1.5° for allowing the water to flow down the channels and  
753 returning to the tank and restart the cycle. Arrows show the direction of recycled  
754 irrigation water. The figure is not to scale.

755

756 **Figure 2** Dry weight of tomato plants grown in the NFT-type experimental system.  
757 Error bars indicate S.E.M.

758

759 **Figure 3** Non-metric multidimensional scaling of microorganisms inhabiting the  
760 recycled irrigation water of the experimental NFT system, using T-RFLP profiles of  
761 16S rRNA (a, c) and 23S rRNA (b, d). Each shape represents a different time point  
762 and a different water sample of filtered (Water *ssf*) and non filtered (Water *co*)  
763 recycled irrigation water: black dots 7*ssf*; red crosses are 7*co*; blue squares 14*ssf*;  
764 pink filled squares 14*co*; green crosses 21*ssf*; purple circles 21*co*; green diamonds  
765 28*ssf*; and blue stars 28*co*. Elliptic shapes group samples of filtered (*ssf*) recycled  
766 irrigation water after 14, 21 and 28 days. Each rRNA gene is represented by two  
767 profiles obtained with two different restriction enzymes: 16S *MseI* (a) and *HaeIII*(c),  
768 23S *MseI* (b) and *HaeIII*(d). Each nMDS plot is provided with correspondent stress  
769 value and regression analysis.

770

771 **Figure 4** Major classes of bacteria identified with the pyrosequencing of the V6  
772 region of bacterial 16S rRNA. Plots show relative abundance (percentage) of the

773 reads obtained at the 4 time points (7, 14, 21 and 28 days) for a) filtered recycled  
774 irrigation water (Water *ssf*), b) control recycled irrigation water (Water *co*) and c) top  
775 layer of the slow sand filter (Sand *top*).

776

777 **Figure 5** V6 amplicon sequences from the three groups of samples assigned with  
778 BLAST and MEGAN. Coloured bars display the relative abundance for each taxon of  
779 bacteria.

780

781 **FIGURES**

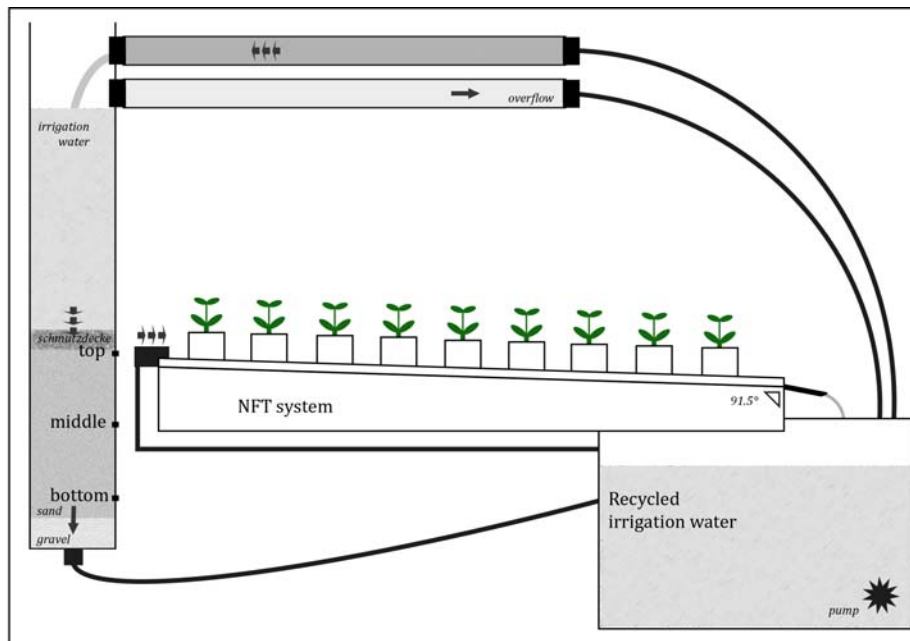

782

783 **Figure 1**

784

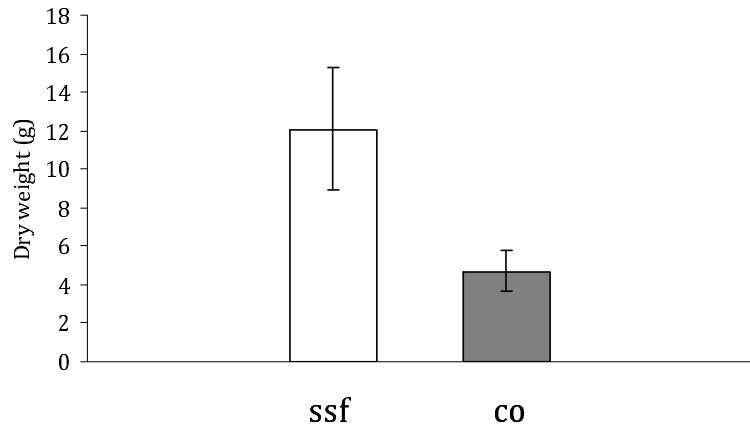

785

786 **Figure 2**

787

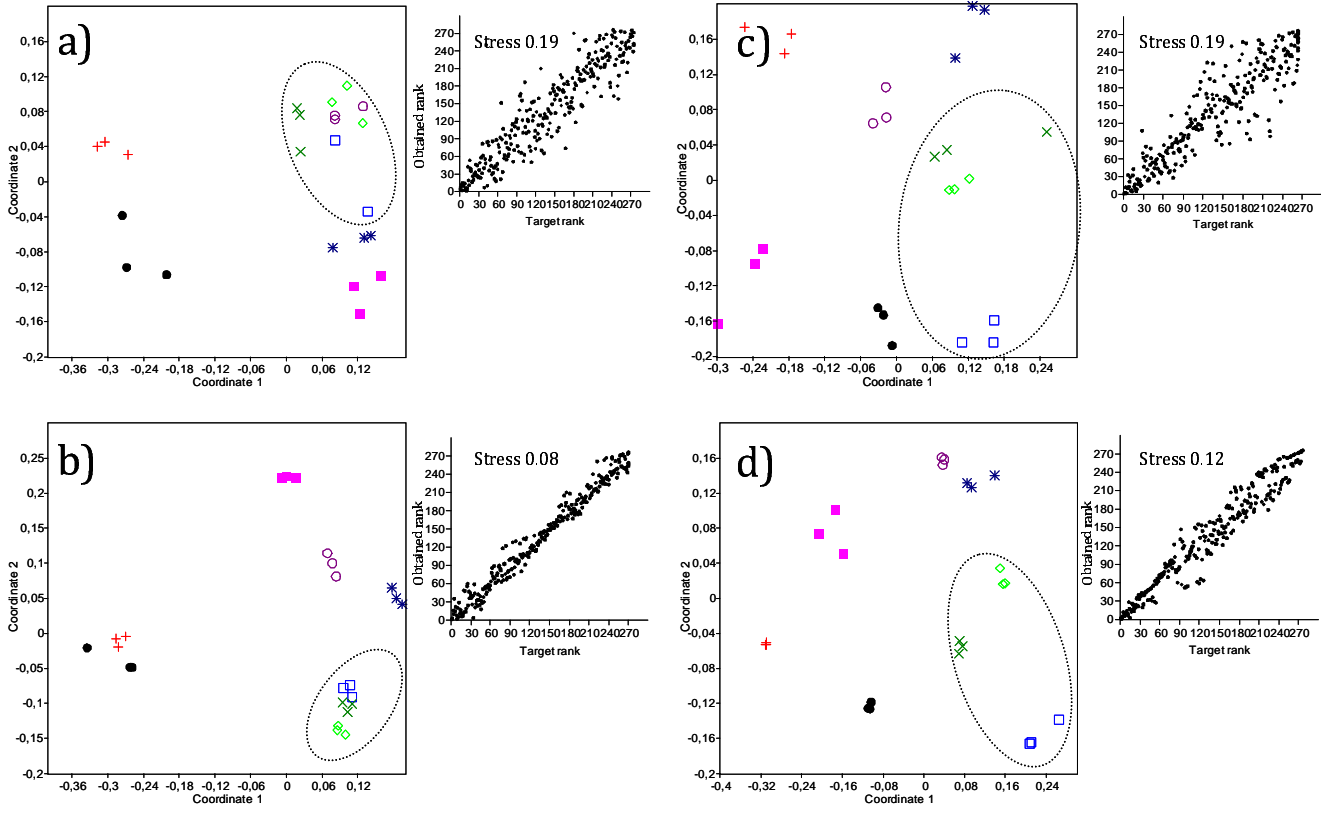

788

789 **Figure 3**

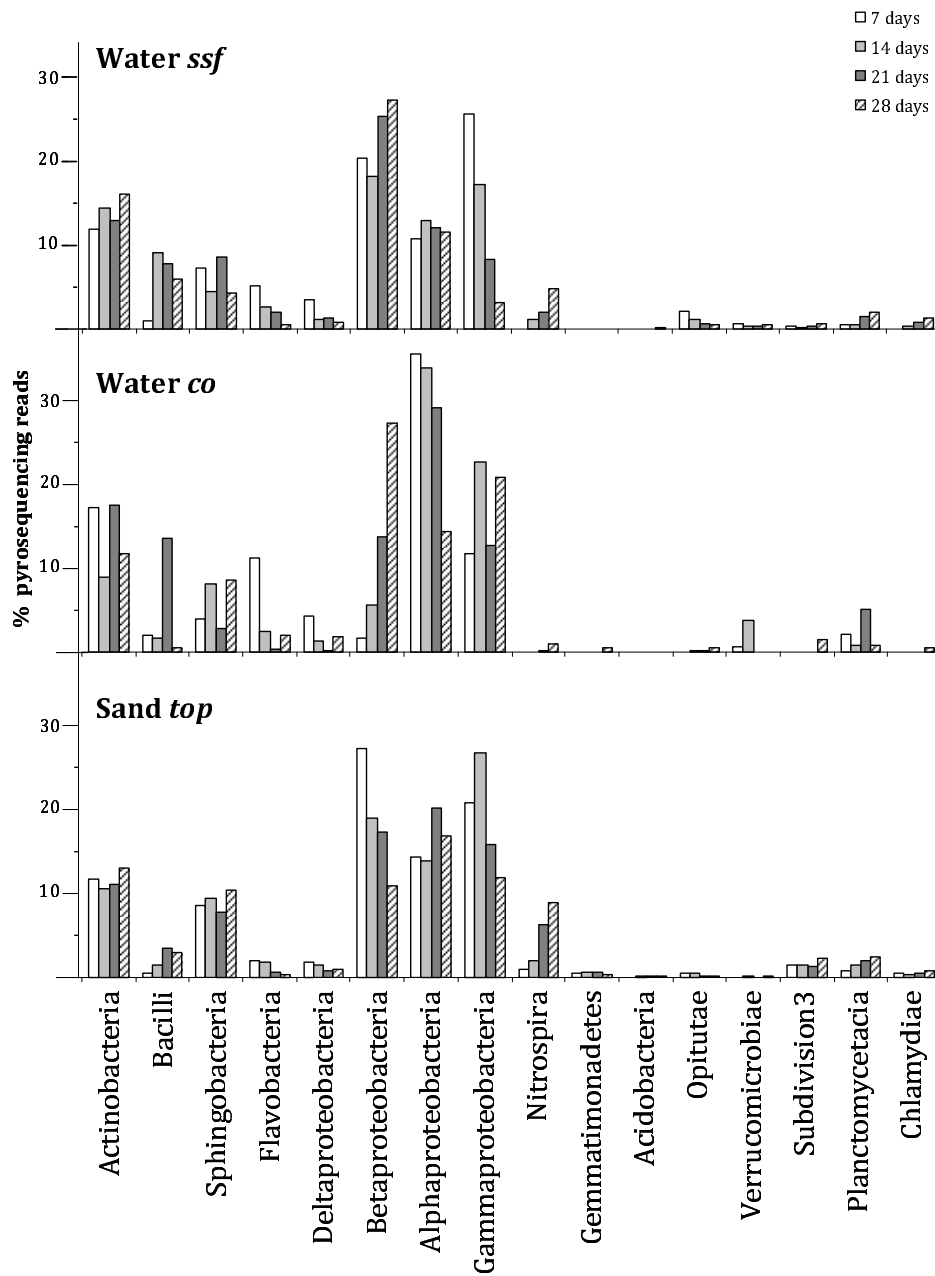

**Figure 4**

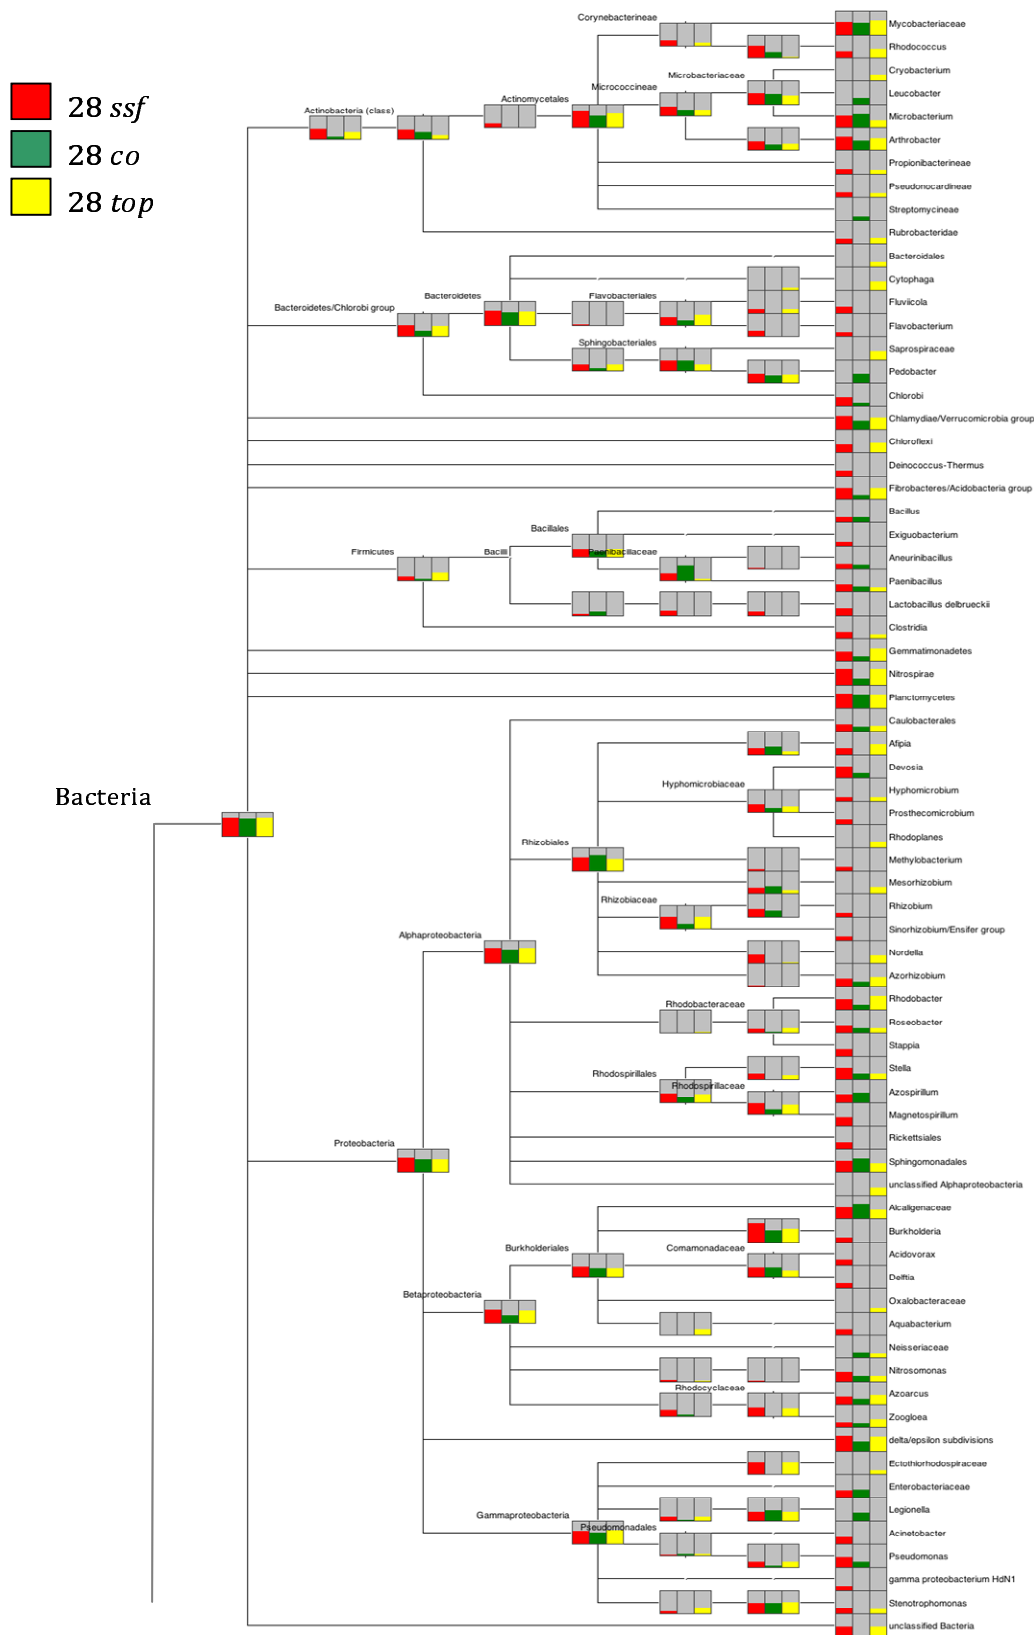

**Figure 5**

**Table 1** Primer pairs used in this study for the amplification of ribosomal DNA for T-RFLP and pyrosequencing

| Gene     | Primer | Method         | Sequence (5'→3') <sup>a</sup> | Annealing Temperature (°C) |
|----------|--------|----------------|-------------------------------|----------------------------|
| 23S rRNA | 23Sfor | T-RFLP         | GCGATTTTCYGAAYGGGGRAACCC      | 63                         |
|          | 23Srev |                | TTCGCCTTTCCCTCACGGTACT        |                            |
| 16S rRNA | 341for | T-RFLP         | CCTACGGGAGGCAGCAG             | 52                         |
|          | 926rev |                | CCGTCAATTCCTTTRAGTTT          |                            |
| 16S rRNA | V6for  | Pyrosequencing | AACAGGATTAGATACCCTGGTAGTC     | 57                         |
|          | V6rev  |                | ACAYCCYTGCASCACCT             |                            |

<sup>a</sup> R=A+G, Y=C+T, S=C+G



800 **Table 2** Observed two-way ANOSIM test values and probabilities of null hypotheses  
 801 ( $H_0$ ) tests obtained comparing T-RFLP datasets of 16S and 23S rRNA genes with  
 802 the enzymes *MseI* and *HaeIII*.  $H_0$  was tested between time points ( $H_0$  time) and  
 803 water sample coming from recycled irrigation water treated with the slow sand filter  
 804 and control water ( $H_0$  ssf)

| NFT  | Gene | <i>MseI</i> |             | <i>HaeIII</i> |             |
|------|------|-------------|-------------|---------------|-------------|
|      |      | R-value     | Probability | R-value       | Probability |
| NFT1 |      | $H_0$ time  |             |               |             |
|      | 16S  | 0.81778     | < 0.0001    | 0.93519       | < 0.0001    |
|      | 23S  | 0.99537     | < 0.0001    | 0.82469       | < 0.0001    |
|      |      | $H_0$ ssf   |             |               |             |
|      | 16S  | 0.85417     | < 0.0001    | 1             | < 0.0001    |
|      | 23S  | 0.87963     | < 0.0001    | 1             | < 0.0001    |
| NFT2 |      | $H_0$ time  |             |               |             |
|      | 16S  | 0.98611     | < 0.0001    | 0.96759       | < 0.0001    |
|      | 23S  | 0.89198     | < 0.0001    | 0.94599       | < 0.0001    |
|      |      | $H_0$ ssf   |             |               |             |
|      | 16S  | 0.98148     | < 0.0001    | 0.99074       | < 0.0001    |
|      | 23S  | 0.87037     | < 0.0001    | 0.92593       | < 0.0001    |
| NFT3 |      | $H_0$ time  |             |               |             |
|      | 16S  | 0.77006     | < 0.0001    | 0.97840       | < 0.0001    |
|      | 23S  | 1           | < 0.0001    | 1             | < 0.0001    |
|      |      | $H_0$ ssf   |             |               |             |
|      | 16S  | 0.83333     | < 0.0001    | 0.97222       | < 0.0001    |
|      | 23S  | 1           | < 0.0001    | 1             | < 0.0001    |

805

806

807 **Table 3** Data summary of total reads from pyrosequencing data. “Trimmed reads”  
808 represent the number of DNA sequences longer than 50bp that were kept after  
809 quality filtering. “Unique reads” represent the number of distinct sequences within a  
810 set of Trimmed reads  
811

| Sample ID | Total reads | Trimmed reads | Unique reads |
|-----------|-------------|---------------|--------------|
| 7ssf      | 25005       | 22951         | 11237        |
| 14ssf     | 31852       | 28133         | 15083        |
| 21ssf     | 34518       | 29400         | 15282        |
| 28ssf     | 23580       | 21125         | 11525        |
| 7co       | 21080       | 16967         | 7367         |
| 14co      | 58995       | 52248         | 23295        |
| 21co      | 21107       | 19845         | 8872         |
| 28co      | 8808        | 6740          | 3803         |
| 7top      | 22842       | 21191         | 10697        |
| 14top     | 42472       | 38961         | 19473        |
| 21top     | 26581       | 22842         | 11723        |
| 28top     | 15768       | 11039         | 6131         |
| $\Sigma$  | 332608      | 291442        | 144488       |

812

813

814

815 **Table 4** Similarity-based OTUs and species richness estimators

| Sample ID | Trimmed reads | Cluster distance |       |       |      |       |       |      |      |       |
|-----------|---------------|------------------|-------|-------|------|-------|-------|------|------|-------|
|           |               | 0.03             |       |       | 0.05 |       |       | 0.1  |      |       |
|           |               | OTUs             | ACE   | Chao1 | OTUs | ACE   | Chao1 | OTUs | ACE  | Chao1 |
| 7ssf      | 22951         | 4942             | 18053 | 11016 | 3848 | 11713 | 7819  | 2730 | 6831 | 4929  |
| 14ssf     | 28133         | 6344             | 22750 | 13970 | 4900 | 14660 | 9875  | 3434 | 8449 | 6115  |
| 21ssf     | 29400         | 6634             | 23351 | 15100 | 5126 | 16287 | 10828 | 3602 | 8582 | 6221  |
| 28ssf     | 21125         | 5684             | 22455 | 13288 | 4642 | 16133 | 9893  | 3385 | 9673 | 6549  |
| 7co       | 16967         | 3107             | 10495 | 6868  | 2378 | 7269  | 4936  | 1648 | 4469 | 3165  |
| 14co      | 52248         | 8468             | 26004 | 17369 | 6211 | 16225 | 11847 | 3954 | 8314 | 6801  |
| 21co      | 19845         | 3567             | 10942 | 7436  | 2661 | 6893  | 4953  | 1738 | 3729 | 3053  |
| 28co      | 6740          | 1883             | 7916  | 4530  | 1522 | 5340  | 3397  | 1102 | 3448 | 2258  |
| 7top      | 21191         | 4928             | 18547 | 11588 | 3768 | 12325 | 8001  | 2564 | 7089 | 4875  |
| 14top     | 38961         | 7507             | 24877 | 16126 | 5604 | 15738 | 10928 | 3624 | 7872 | 5976  |
| 21top     | 22842         | 5244             | 17773 | 11664 | 4087 | 12364 | 8425  | 2820 | 7378 | 5257  |
| 28top     | 11039         | 3147             | 11409 | 7271  | 2518 | 8312  | 5440  | 1825 | 5921 | 3757  |

816

817

818 **Table 5** Number of OTUs and diversity indices obtained from T-RFLP and pyrosequencing of the 16S region of rRNA

| Sample ID | T-RFLP            |                   |      |                     |      |      | Pyrosequencing cluster distance |      |      |      |      |      |      |      |      |
|-----------|-------------------|-------------------|------|---------------------|------|------|---------------------------------|------|------|------|------|------|------|------|------|
|           | 16S- <i>Mse</i> I |                   |      | 16S- <i>Hae</i> III |      |      | 0.03                            |      |      | 0.05 |      |      | 0.1  |      |      |
|           | OTUs              | $H'$ <sup>a</sup> | 1-D  | OTUs                | $H'$ | 1-D  | OTUs                            | $H'$ | 1-D  | OTUs | $H'$ | 1-D  | OTUs | $H'$ | 1-D  |
| 7ssf      | 4                 | 1.26              | 0.66 | 4                   | 1.42 | 0.71 | 4942                            | 5.43 | 0.98 | 3848 | 5.21 | 0.98 | 2730 | 4.78 | 0.97 |
| 14ssf     | 5                 | 0.96              | 0.42 | 3                   | 1.06 | 0.64 | 6344                            | 5.64 | 0.99 | 4900 | 5.41 | 0.99 | 3434 | 4.93 | 0.98 |
| 21ssf     | 16                | 2.54              | 0.90 | 17                  | 2.54 | 0.90 | 6634                            | 5.52 | 0.98 | 5126 | 5.28 | 0.98 | 3602 | 4.83 | 0.97 |
| 28ssf     | 13                | 2.20              | 0.84 | 13                  | 2.12 | 0.82 | 5684                            | 5.79 | 0.97 | 4642 | 5.56 | 0.97 | 3385 | 5.06 | 0.96 |
| 7co       | 11                | 2.07              | 0.84 | 5                   | 1.43 | 0.72 | 3107                            | 4.55 | 0.97 | 2378 | 4.34 | 0.97 | 1648 | 3.94 | 0.96 |
| 14co      | 6                 | 1.63              | 0.77 | 24                  | 2.89 | 0.93 | 8468                            | 5.19 | 0.98 | 6211 | 5.00 | 0.98 | 3954 | 4.62 | 0.98 |
| 21co      | 15                | 2.53              | 0.91 | 6                   | 1.56 | 0.76 | 3567                            | 4.87 | 0.97 | 2661 | 4.70 | 0.97 | 1738 | 4.24 | 0.96 |
| 28co      | 16                | 2.50              | 0.90 | 18                  | 2.61 | 0.91 | 1883                            | 4.90 | 0.98 | 1522 | 4.67 | 0.98 | 1102 | 4.19 | 0.97 |
| 7top      | 14                | 2.24              | 0.86 | 13                  | 2.04 | 0.80 | 4928                            | 5.50 | 0.98 | 3768 | 5.28 | 0.98 | 2564 | 4.82 | 0.98 |
| 14top     | 11                | 2.06              | 0.83 | 21                  | 2.65 | 0.90 | 7507                            | 5.51 | 0.98 | 5604 | 5.27 | 0.97 | 3624 | 4.74 | 0.97 |
| 21top     | 22                | 2.78              | 0.92 | 18                  | 2.51 | 0.89 | 5244                            | 5.73 | 0.96 | 4087 | 5.50 | 0.96 | 2820 | 4.93 | 0.94 |
| 28top     | 28                | 3.10              | 0.95 | 18                  | 2.62 | 0.91 | 3147                            | 5.52 | 0.98 | 2518 | 5.30 | 0.98 | 1825 | 4.84 | 0.98 |

819

820 <sup>a</sup>  $H'$  = Shannon index; 1-D = Simpson's index

821

822 **Table 6** Major microorganisms identified by T-RFLP and clone libraries. The column Relative abundance indicates the increase  
 823 (arrows going upwards), or the decrease (arrows going downwards) of the relative amount of fluorescence in filtered water (Water  
 824 *ssf*) as compared to control water (Water *co*)

825

| Gene     | Genus/Species                   | T-RFs        |                | Relative abundance |
|----------|---------------------------------|--------------|----------------|--------------------|
|          |                                 | <i>Mse</i> I | <i>Hae</i> III |                    |
| 16S rRNA | <i>Cellvibrio</i> sp.           | 589          | 509            | ↑*                 |
|          | <i>Nitrosospira</i> sp.         | 588          | 588            | ↑*                 |
|          | <i>Novosphingobium</i> sp.      | 564          | 484            | ↓                  |
|          | <i>Pseudomonas</i> sp.          | 374          | 31 (585)       | ↑*                 |
| 23S rRNA | <i>Azoarcus aromaticum</i>      | 372          | 312            | ↑*                 |
|          | <i>Paenibacillus</i> sp.        | 422          | 169            | ↑                  |
|          | <i>Ochrobactrum intermedium</i> | 515          | 201            | ↑                  |
|          | <i>Sphingomonas</i> sp.         | 337          | 202            | ↓                  |

826

827 \* indicates that the difference of relative abundance between filtered water (Water *ssf*) and control water (Water *co*) was statistically  
 828 significant

829

830

831
